# Supplementary material
Source: Springer Nature journal article supplement (https://www.springermedizin.de/resource/supplementary/12883_2010_393_MOESM4_ESM.pdf/9455050)

m/z 4473, pH 5

< 17.19

≥ 17.19

m/z 4588, pH 7

< 48.12

≥ 48.12

MMD  
0/15

control  
12/1

MMD  
0/4

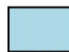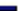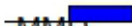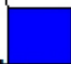

Supplement: MOESM4 [file 9455050]
